# Supplementary material for: Semantically enabling a genome-wide association study database
Source: Springer Nature journal article supplement (doi:10.1186/2041-1480-3-9), 2012-01-01
Supplement: 13326_2012_105_MOESM2_ESM.pdf [file 13326_2012_105_MOESM2_ESM.pdf]

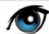

Enter a phenotype term (MeSH or HPO)

rhe

|                                |      |
|--------------------------------|------|
| Rheumatoid arthritis           | HPO  |
| Rheumatoid arthritis, juvenile | HPO  |
| Rheumatoid Spondylitis         | MeSH |
| Rheumatoid Arthritis           | MeSH |
| Rheumatoid Arthritis, Juvenile | MeSH |
| Rheumatism                     | MeSH |
| Rheumatic Disease              | MeSH |
| Rheumatic Diseases             | MeSH |

## HPO

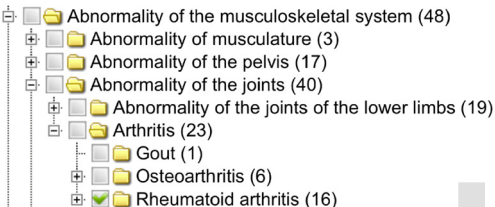

## MeSH

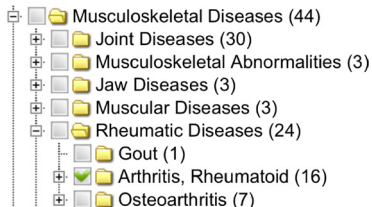

## Results

16 Phenotypes tested in Studies match MeSH/HPO phenotype term **Rheumatoid Arthritis**

Order results by  No. per page  Export these results as   Related data

| Phenotype tested in Study                                                | Phenotype ontology annotation                                                                   | Total p-values in Study | Study                                                          | Add data sets to Browser           | Related Study data                                                             |
|--------------------------------------------------------------------------|-------------------------------------------------------------------------------------------------|-------------------------|----------------------------------------------------------------|------------------------------------|--------------------------------------------------------------------------------|
| Anti-cyclic citrullinated peptide-positive rheumatoid arthritis (HGVP38) | <ul style="list-style-type: none"> <li>Arthritis, Rheumatoid</li> </ul>                         | 297,085                 | GWAS of rheumatoid arthritis (HGVST27)                         | <input type="button" value="Add"/> | <ul style="list-style-type: none"> <li>Results</li> <li>Chromosomes</li> </ul> |
| Celiac disease and rheumatoid arthritis (HGVP1262)                       | <ul style="list-style-type: none"> <li>Celiac Disease</li> <li>Arthritis, Rheumatoid</li> </ul> | 15                      | GWAS of celiac disease and rheumatoid arthritis (HGVST736)     | <input type="button" value="Add"/> | <ul style="list-style-type: none"> <li>Results</li> <li>Chromosomes</li> </ul> |
| Juvenile idiopathic arthritis (HGVP222)                                  | <ul style="list-style-type: none"> <li>Arthritis, Juvenile Rheumatoid</li> </ul>                | 1                       | GWAS of juvenile idiopathic arthritis (HGVST172)               | <input type="button" value="Add"/> | <ul style="list-style-type: none"> <li>Results</li> <li>Chromosomes</li> </ul> |
| Juvenile idiopathic arthritis (HGVP773)                                  | <ul style="list-style-type: none"> <li>Arthritis, Juvenile Rheumatoid</li> </ul>                | 1                       | GWAS of juvenile idiopathic arthritis (HGVST437)               | <input type="button" value="Add"/> | <ul style="list-style-type: none"> <li>Results</li> <li>Chromosomes</li> </ul> |
| Rheumatoid arthritis (HGVP46)                                            | <ul style="list-style-type: none"> <li>Arthritis, Rheumatoid</li> </ul>                         | 251                     | GWAS of rheumatoid arthritis (HGVST34)                         | <input type="button" value="Add"/> | <ul style="list-style-type: none"> <li>Results</li> <li>Chromosomes</li> </ul> |
| Rheumatoid arthritis (HGVP16)                                            | <ul style="list-style-type: none"> <li>Arthritis, Rheumatoid</li> </ul>                         | 61                      | GWAS of rheumatoid arthritis in a British population (HGVST10) | <input type="button" value="Add"/> | <ul style="list-style-type: none"> <li>Results</li> <li>Chromosomes</li> </ul> |
