# Supplementary material for: Semantically enabling a genome-wide association study database
Source: Springer Nature journal article supplement (doi:10.1186/2041-1480-3-9), 2012-01-01

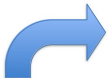

MeSH Tree Structures - 2012

[Return to Entry Page](#)

- 1. • Anatomy [A]
- 2. • Organisms [B]
- 3. • Diseases [C]
- 4. • Chemicals and Drugs [D]
- 5. • Analytical, Diagnostic and Therapeutic Techniques and Equipment [E]
- 6. • Psychiatry and Psychology [F]
- 7. • Phenomena and Processes [G]
- 8. • Disciplines and Occupations [H]
- 9. • Anthropology, Education, Sociology and Social Phenomena [I]
- 10. • Technology, Industry, Agriculture [J]
- 11. • Humanities [K]
- 12. • Information Science [L]
- 13. • Named Groups [M]
- 14. • Health Care [N]
- 15. • Publication Characteristics [Y]
- 16. • Geographicalical [Z]

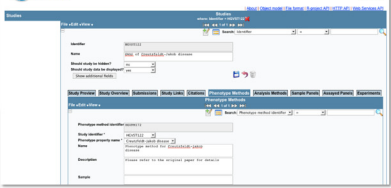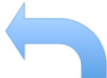

HPO

- All
- Mode of inheritance
- Onset and clinical course
- Phenotypic abnormality
- Abnormality of connective tissue
- Abnormality of head and neck
- Abnormality of prenatal development or birth
- Abnormality of metabolism/homeostasis
- Abnormality of the abdomen
- Abnormality of the breast
- Abnormality of the cardiovascular system
- Abnormality of the ear
- Abnormality of the endocrine system
- Abnormality of the eye
- Abnormality of the genitourinary system
- Abnormality of the hematopoietic system
- Abnormality of the immune system
- Abnormality of the integument
- Abnormality of the musculoskeletal system
- Abnormality of the nervous system
- Abnormality of the respiratory system
- Growth abnormality
- Neoplasia

Phenotype A: Number of teeth

Tooth  
D014070

Abnormal number of teeth  
HP:0006483

Phenotype B: Breast cancer

Breast Neoplasms  
D001943

Breast cancer  
HP:0003002

MeSH <-> HPO

Phenotype C: Creutzfeldt-Jakob disease

Creutzfeldt-Jakob Syndrome  
D007562

Creutzfeldt-Jakob disease  
#123400

MeSH <-> OMIM

Hallucinations  
HP:0000738

Memory loss  
HP:0002081

Gait ataxia  
HP:0002066

Loss of facial expression  
HP:0005327

OMIM <-> HPO

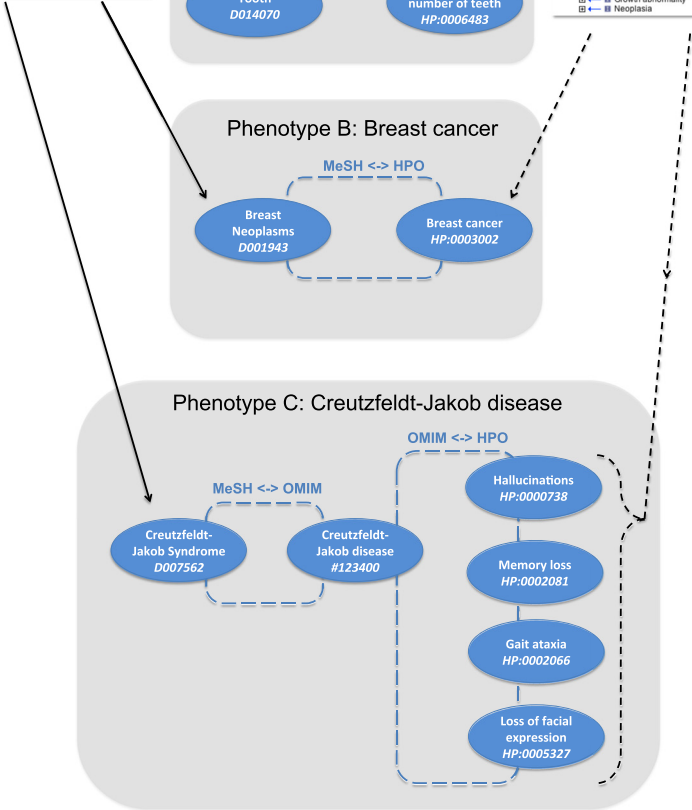

Supplement: 13326_2012_105_MOESM4_ESM.pdf [file 13326_2012_105_MOESM4_ESM.pdf]
