# Supplementary material for: Semantically enabling a genome-wide association study database
Source: Springer Nature journal article supplement (doi:10.1186/2041-1480-3-9), 2012-01-01

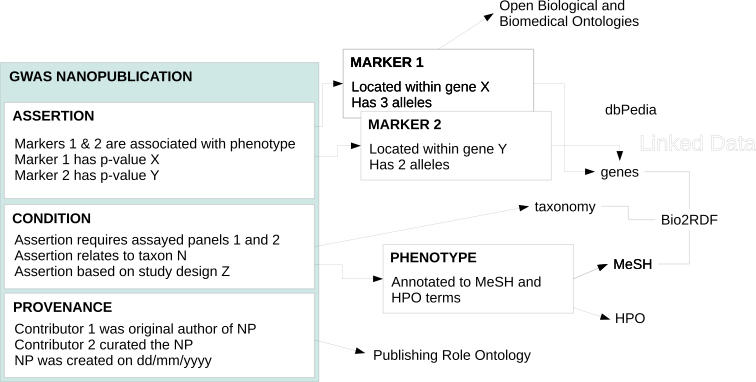

Supplement: 13326_2012_105_MOESM5_ESM.pdf [file 13326_2012_105_MOESM5_ESM.pdf]
