# Supplementary material for: Semantically enabling a genome-wide association study database
Source: Springer Nature journal article supplement (doi:10.1186/2041-1480-3-9), 2012-01-01
Supplement: 13326_2012_105_MOESM6_ESM.pdf [file 13326_2012_105_MOESM6_ESM.pdf]

```
PREFIX mesh:<http://bio2rdf.org/mesh:>
PREFIX rdf:<http://www.w3.org/1999/02/22-rdf-syntax-ns#>
PREFIX gc:<http://purl.org/gwas/schema#>
PREFIX xsd:<http://www.w3.org/2001/XMLSchema#>
CONSTRUCT {
    ?phenotype rdf:type <http://example.com/CAD>;
    <http://example.com/gene> ?gene;
    <http://example.com/annotation> ?annotation;
    <http://example.com/meshTerm> ?meshterm;
    <http://example.com/hpoTerm> ?hpoterm;
    <http://example.com/gene> ?gene.
    ?gene <http://example.com/marker> ?marker.
    ?marker <http://example.com/pvalue> ?pvalue.
}
WHERE
{ GRAPH ?g
    {
        ?phenotype gc:meshAnnotation ?meshterm.
        optional {?phenotype gc:hpoAnnotation ?hpoterm}
        ?marker gc:associated ?phenotype;
        gc:pvalue ?pvalue;
        gc:locatedInGene ?gene.
    }
    FILTER (xsd:float(?pvalue) <= 10e-7 && ?meshterm = mesh:D003324)
}
```
