# Supplementary material for: Semantically enabling a genome-wide association study database
Source: Springer Nature journal article supplement (doi:10.1186/2041-1480-3-9), 2012-01-01
Supplement: 13326_2012_105_MOESM7_ESM.pdf [file 13326_2012_105_MOESM7_ESM.pdf]

```
PREFIX rdf:<http://www.w3.org/1999/02/22-rdf-syntax-ns#>
PREFIX gc:<http:// purl.org/gwas/schema#>
PREFIX xsd:<http://www.w3.org/2001/XMLSchema#>
PREFIX obo:<http://www.obofoundry.org/ro/ro.owl#>
SELECT *
WHERE
{ GRAPH ?g
  {
    ?phenotype gc:meshAnnotation ?meshterm.
    ?marker gc:associated ?phenotype;
    gc:locatedInGene ?gene;
    gc:pvalue ?pvalue;
    obo:hasSynonym ?ext_marker_id.
    optional {?phenotype gc:hpoAnnotation ?hpoterm}
  }
  FILTER (xsd:float(?pvalue) <= 1e-10)
}
```
